# Supplementary material for: Unveiling Novel ERCC1–XPF Complex Inhibitors: Bridging the Gap from In Silico Exploration to Experimental Design
Source: MDPI journal article supplement (doi:10.3390/ijms25021246), 2024-01-19
Supplement: s1 [file s1]

# Supplementary Materials

|                                                                                                          |                                                                                                           |                                                                                                            |
|----------------------------------------------------------------------------------------------------------|-----------------------------------------------------------------------------------------------------------|------------------------------------------------------------------------------------------------------------|
| <p>CB1—47333069</p> 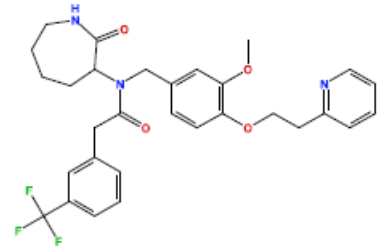    | <p>CB18—46745822</p>    | <p>CB23—5522014</p>     |
| <p>CB25—5901061</p>     | <p>CB27—43661655</p>    | <p>CB36—7980399</p>     |
| <p>CB39—21651569</p>  | <p>CB40—21391326</p>  | <p>CB47—7093750</p>   |
| <p>CB48—6452349</p>   | <p>CB50—5662306</p>   | <p>CB53—5980628</p>   |
| <p>CB57—7360782</p>   | <p>CB60—7763930</p>   | <p>CB64—69681254</p>  |
| <p>DB7—Reboxetine</p>                                                                                    | <p>NCI11—169112</p>                                                                                       | <p>NCI12—169174</p>                                                                                        |

|                                                                                                       |                                                                                                        |                                                                                                         |
|-------------------------------------------------------------------------------------------------------|--------------------------------------------------------------------------------------------------------|---------------------------------------------------------------------------------------------------------|
| 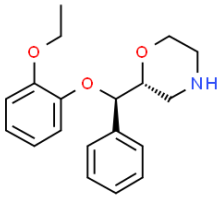                     |                       |                      |
| <p>NCI18—187778</p>  | <p>NCI31—356836</p>  | <p>NCI33—644964</p>  |
| <p>NCI27—40762</p>  |                                                                                                        |                                                                                                         |

**Figure S1.** List and chemical structures of the 22 compounds identified as best inhibitors that could enhance cisplatin-induced cytotoxicity.
